# Supplementary material
Source: publisher figshare collection journal article supplement (https://gsajournals.figshare.com/ndownloader/files/25732916)
Supplement: Supplementary file 1 [file 25732916]

| **Abbreviated Name** | **Species** | **GenBank ID** | **Other ID** |
| --- | --- | --- | --- |
| Amaj_ROSEA1 | Antirrhinum majus | ABB83826.1 |  |
| Amaj_ROSEA2 | Antirrhinum majus | ABB83827.1 |  |
| Amaj_VENOSA | Antirrhinum majus | ABB83828.1 |  |
| Amaj_MIXTA | Antirrhinum majus | CAA55725.1 |  |
| Amaj_DEL | Antirrhinum majus | AAA32663.1 |  |
| Lil_MybA | Lilium hybrid | BAJ05399.1 |  |
| Lil_MybB | Lilium hybrid | BAJ05398.1 |  |
| LjTT2a | Lotus japonicus | BAG12893.1 |  |
| Mdom_Myb10a | Malus domestica | ABB84754.1 |  |
| Mlew_GUIDELESS | Mimulus lewisii | AGE09536.1 |  |
| Pet_An2 | Petunia x hybrida | AAF66727.1 |  |
| Pet_ADQ | Petunia x hybrida | ADQ00392.1 |  |
| Pet_ADWa | Petunia x hybrida | ADW94950.1 |  |
| Pet_ADWb | Petunia x hybrida | ADW94951.1 |  |
| Pet_AAG | Petunia x hybrida | AAG25928.1 |  |
| PET_JAF13 | Petunia x hybrida | AAC39455.1 |  |
| VvMybA1 | Vitis vinifera | BAD18977.1 |  |
| VvMybA2 | Vitis vinifera | BAD18978.1 |  |
| VvMybPA2 | Vitis vinifera | ACK56131.1 |  |
| VvACC | Vitis vinifera | ACC68685.1 |  |
| VvMyc | Vitis vinifera | ABM92332.3 |  |
| Zma_MYB | Zea mays | P27898.1 |  |
| Zma_CAA | Zea mays | CAA40544.1 |  |
| Zma_AAA | Zea mays | AAA33504.1 |  |
| Mlew_PELAN | Mimulus lewisii | AHJ80987.1 |  |
| Mlew_NEGAN | Mimulus lewisii | AHJ80988.1 |  |
| Mlew_PELANL1 | Mimulus lewisii | AIC32297.1 |  |
| Mlew_PELANL2 | Mimulus lewisii | AIC32298.1 |  |
| Mlew_PELANL3 | Mimulus lewisii | AIC32299.1 |  |
| MgMyb1 | Mimulus guttatus | from Phytozome | mgv1a023671m |
| MgMyb2 | Mimulus guttatus | from Phytozome | mgv1a024703m |
| MgMyb3 | Mimulus guttatus | from Phytozome | mgv1a024703m |
| MgMyb4 | Mimulus guttatus | from Phytozome | mgv1a025765m |
| MgMyb5 | Mimulus guttatus | from Phytozome | mgv1a019326m |
| Mlu_12200 | Mimulus luteus | from Edger et al. | Mlu_12200 |
| Mlu_12207 | Mimulus luteus | from Edger et al. | Mlu_12207 |
| Mlu_42095 | Mimulus luteus | from Edger et al. | Mlu_42095 |
